# Supplementary material for: Oral Health Recovery: A Peer Support Specialist–Led Health Education Program for People With Serious Mental Illness
Source: Atypon-hosted journal article supplement (doi:10.1176/appi.ps.20220465), 2023-03-14

## Online Supplement

### I. *Oral health resources for program implementation*

- a. Oral Health educational videos used as part of the Peer Support Specialist training are available on YouTube from the Michigan Community Health Worker Alliance (MiCHWA)
  - i. Module 1: [https://youtu.be/Bg6plK\\_VLQE](https://youtu.be/Bg6plK_VLQE)
  - ii. Module 2: <https://youtu.be/vhWJw5n7rq4>
- b. Oral Health Recovery flipcharts are available for purchase from McMillen Health at <https://www.brushdental.org/resources/p/adult-oral-health-recovery-flip-chart>

### II. *Outline of Oral Health Recovery flipchart topics*

#### Required pages:

It's never too late (p. 2)  
At home care (p. 4)  
Your dental home (p. 6)  
Cavities and gum disease (p. 10)  
Oral health stigma (p. 16)  
Oral health & mental health (p. 18)  
Putting it all together (p. 24)

#### Optional pages:

Taking medications (p. 8)  
Denture care (p. 12)  
Oral health emergencies (p. 14)  
Oral health & daily habits (p. 20)  
Oral health & chronic conditions (p. 22)  
Paying it forward (p. 26)

### III. *Sample client-facing and peer-facing flip chart pages. In an A-shaped flip chart, one side faces the provider and the other faces the patient.*

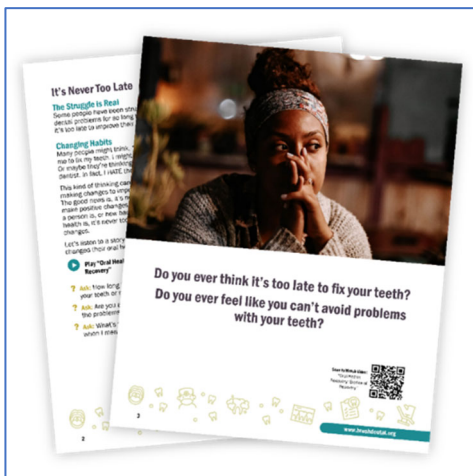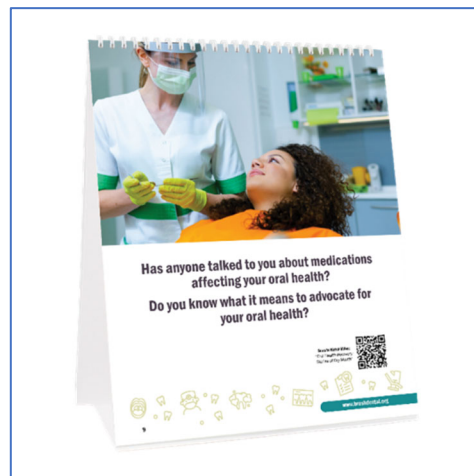

Supplement: appi.ps.20220465.ds001.pdf [file appi.ps.20220465.ds001.pdf]
